# Supplementary material for: Effects of Repeated Heating on Fatty Acid Composition of Plant-Based Cooking Oils
Source: MDPI journal article supplement (doi:10.3390/foods11020192), 2022-01-12
Supplement: s1 [file s1]

**Table S1:** Changes in *trans* isomeric fatty acids in five different plant-based oils in fresh samples and after one (1H), five (5H) and ten heating sequences (10H).

|                    | Palm oil     |       | Soybean oil  |       | Rapeseed oil |       | Sunflower oil |       | EV Olive oil |       |
|--------------------|--------------|-------|--------------|-------|--------------|-------|---------------|-------|--------------|-------|
|                    | mean         | SD    | mean         | SD    | mean         | SD    | mean          | SD    | mean         | SD    |
| <b>C18:1n-7/9t</b> |              |       |              |       |              |       |               |       |              |       |
| Fresh              | <b>0.075</b> | 0.003 | <b>0.036</b> | 0.002 | <b>0.026</b> | 0.009 | <b>0.030</b>  | 0.003 | <b>0.046</b> | 0.022 |
| 1H                 | <b>0.099</b> | 0.004 | <b>0.084</b> | 0.055 | <b>0.066</b> | 0.004 | <b>0.038</b>  | 0.005 | <b>0.069</b> | 0.011 |
| 5H                 | <b>0.111</b> | 0.003 | <b>0.086</b> | 0.025 | <b>0.080</b> | 0.010 | <b>0.057</b>  | 0.003 | <b>0.068</b> | 0.002 |
| 10H                | <b>0.136</b> | 0.011 | <b>0.091</b> | 0.037 | <b>0.102</b> | 0.003 | <b>0.070</b>  | 0.002 | <b>0.103</b> | 0.015 |
| <b>C18:2n-6tt</b>  |              |       |              |       |              |       |               |       |              |       |
| Fresh              | <b>0.006</b> | 0.000 | <b>0.005</b> | 0.001 | <b>n.d.</b>  | -     | <b>0.004</b>  | 0.000 | <b>n.d.</b>  | -     |
| 1H                 | <b>0.005</b> | 0.002 | <b>0.004</b> | 0.002 | <b>n.d.</b>  | -     | <b>0.003</b>  | 0.001 | <b>n.d.</b>  | -     |
| 5H                 | <b>0.006</b> | 0.001 | <b>0.008</b> | 0.001 | <b>n.d.</b>  | -     | <b>0.007</b>  | 0.001 | <b>n.d.</b>  | -     |
| 10H                | <b>0.007</b> | 0.001 | <b>0.011</b> | 0.003 | <b>0.002</b> | 0.001 | <b>0.011</b>  | 0.001 | <b>0.002</b> | 0.001 |
| <b>C20:1n-9t</b>   |              |       |              |       |              |       |               |       |              |       |
| Fresh              | <b>0.024</b> | 0.002 | <b>0.050</b> | 0.002 | <b>0.023</b> | 0.011 | <b>0.018</b>  | 0.002 | <b>0.010</b> | 0.009 |
| 1H                 | <b>0.029</b> | 0.004 | <b>0.072</b> | 0.029 | <b>0.032</b> | 0.006 | <b>0.028</b>  | 0.003 | <b>0.026</b> | 0.011 |
| 5H                 | <b>0.043</b> | 0.006 | <b>0.073</b> | 0.006 | <b>0.053</b> | 0.008 | <b>0.041</b>  | 0.005 | <b>0.065</b> | 0.001 |
| 10H                | <b>0.069</b> | 0.008 | <b>0.061</b> | 0.005 | <b>0.055</b> | 0.027 | <b>0.051</b>  | 0.012 | <b>0.061</b> | 0.006 |

Each data is calculated from six different chromatograms, data are **mean** (SD); n.d. denotes under detection limit
